# Supplementary material
Source: PubMed Central journal article supplement (PMC2762150)
Supplement: jn.108.104125_1.pdf [file jn.108.104125_1.pdf]

## Online Supporting Material

### Online Supporting Material

#### Sampling of colon specimens

After CO<sub>2</sub> asphyxiation of each mouse the entire colon was quickly removed, placed into ice-cold PBS and 1 cm colonic specimens were taken just distal to the cecum (proximal colon) and above the rectum (distal colon). The remaining colon was cut in half longitudinally. One half was snap frozen and stored in liquid nitrogen (LN2) for and the other half immersed in RNA later™ (Ambion), kept at 4C° for 24h and stored in LN2 for RNA isolation. Proximal and distal colon specimens were embedded in Optimal Cutting Temperature medium, frozen in LN2 pre-cooled isopentane, and stored at -80°C until cryosectioning. Eight µm sections were cut onto Poly-L-lysine coated superfrost/plus slides for F4/80 immunostaining.

#### Analyses and functional interpretation of microarray data

*Functional network and pathway analyses* -Networks, canonical pathways and functional analyses were generated through the use of Ingenuity Pathways Analysis (IPA) (Ingenuity® Systems) (1). IPA Knowledge Base comprises manually curated molecular interactions. Three and 6 mo differentially expressed data sets ( $P$ -value < 0.05, no FDR applied) were used for the analysis. Each gene identifier was mapped to its corresponding gene object in the Ingenuity Pathway Knowledge Base. These so called “focus genes” were then used as a starting point for generating networks and identifying pathways or biological functions. The functional analysis and canonical pathways analyses identified biological functions and pathways that were most significant to the data set. Fischer’s exact test was used to calculate  $p$ -values determining the probability that the association between the genes in the dataset and either canonical pathway or biological function could be explained by chance alone. Significances for biological functions or canonical pathways were assigned to each network by determining a  $P$ -value for the enrichment of the genes in the network for such functions or pathways compared with the whole Ingenuity pathway knowledge base as a reference set. A score of greater than 2 indicates that there is a less than 1 in 100 chance that the Focus Genes were assembled into a network due to random chance alone.

*Gene Ontology*- EASE program (NIH, NIAID) (2) was used to determine which Gene Ontology (GO) categories were statistically over-represented among differentially expressed genes. The enrichment  $P$ -values were calculated using modified Fisher’s exact test with Bonferroni adjustment for multiple testing.  $P$ -values < 0.05 were considered significant. 3 and 6 month differentially expressed gene sets ( $P$ -values < 0.05, no FDR applied) were used for the analysis

*Gene Set Enrichment Analysis* (GSEA) was used to identify statistically significant coordinated changes in a defined gene set between the WD and control groups at 3 and 6 mo. A custom gene set was generated based on thoroughly researched panels of oxidative stress related genes (Superarray Bioscience, Mouse Pathway Focused PCR Array Lists). GSEA analysis was performed using a desktop application available at Broad Institute (3). Normalized expression values for the whole microarray gene set were extracted from GeneSifter and the data were converted from probe sets to gene symbols.

## Online Supporting Material

The input gene set was comprised of C2 pathway and a manually curated literature collection of the Molecular Signature Database Version 1 (MSigDB)(4). *P*-values were calculated by permuting genes 1000 times. Permutation type was set to 'gene set'. False positive rate was controlled by the proportion of false positives by calculating the false discovery rate (FDR) corresponding to each normalized enrichment score (NES). The FDR was computed by comparing the tails of the observed and null distributions for the NES. Gene sets with  $FDR < 0.25$  and nominal *P*-values  $< 0.05$  were considered significant.

### *Validation of Micoarray data by qPCR*

Quantitative RT-PCR (qPCR) was used to verify the microarray results. The same batch of total RNA samples used for microarray analysis from 4 control and 4 experimental mice at both time points were reverse transcribed with random nonamers using Eurogentec (San Diego, CA) RT core kit (RT-RTCK-05) to yield first-strand cDNA. 11 Taqman Gene Expression Assays (ABI, Applied Biosystems; Supplemental Table 3) were designed across exon boundaries to avoid genomic DNA detection. Each assay contains pre-formated primers and Taqman probe in a 20X concentration. Taqman assay reactions were performed in 384-well optical plate and run in the ABI 7900HT Sequence Detection System. Efficiency of all assays was equal as determined from  $\Delta C_t$  vs. log input in validation experiment; therefore the comparative  $\Delta\Delta C_t$  method was used for quantification. All amplification were done in triplicate and real-time thermal profile was set as 50°C/2min, 95°C/10min and 40 cycles of 95°C/15sec; 60°C/1min. The threshold cycle (*C<sub>t</sub>*) scores were averaged for subsequent calculations of relative expression values by using Applied Biosystems Sequence Detection System 2.3 (SDS) software. The *C<sub>t</sub>* scores represent the cycle number at which fluorescence signal crosses the threshold value. The *C<sub>t</sub>* scores for genes of interest for each sample were normalized against *C<sub>t</sub>* scores for the corresponding endogenous control gene, which was GAPDH. The comparative *C<sub>t</sub>* method was used to calculate relative expression between the WD group and controls, the formula is expressed as: relative expression =  $2^{-\Delta\Delta C_t}$ .  
2 = The fold change between *C<sub>t</sub>* values (doubling of PCR amplicon).  
 $\Delta\Delta C_t = (C_t \text{ experiment} - C_t \text{ GAPDH}) - (C_t \text{ control} - C_t \text{ GAPDH})$ .  
This equation means how many doublings or fold changes of amplicon occur between cycles of your control (calibrator) vs. experiment samples.

### **Digital image acquisition for computerized histomorphometry analysis**

Digital images of microscopic fields of cross sections (x20 objective and x10 ocular lenses) were acquired with a Zeiss Axioplan2 microscope equipped with QImaging Retiga Camera system and integrated LCD filter. Camera settings were at maximal sensitivity and 1/400 sec exposure time. White balancing was performed before image acquisition. Digital images were saved in 24-bit color TIFF format. For each mouse, 5-7 images of the colonic cross section were taken to represent the entire section.

### **Pro- and anti-inflammatory protein expression profiling**

Clarified tissue extracts of mid colon from 10 mice/group, 40 samples in total, were analyzed by a Rodent Multi-Analyte Profile testing (Rules-Based Medicine, Rodent MAP version 1.6 antigen panel;) (5), a high-density, quantitative immunoassay of pro-and anti-inflammatory protein expression in small samples. Tissues were homogenized in 9

## Online Supporting Material

volumes of lysis buffer (weight/volume; 0.05 mol/L, Tris-HCL with 2 mmol/L EDTA, pH 7.4) containing protease and phosphatase inhibitor cocktails (P 8340 and P 5726, Sigma, MI, U.S.A) and centrifuged for 2 min at 13, 000xg. Supernatant fractions were collected and frozen at -80°C until analysis by the Rodent MAP testing. The Least Detectable Dose (LDD) for each analyte is defined as the mean background value for 20 determinations plus three standard deviations. Values above the LDD possess excellent precision with coefficients of variation (CV) usually below 10%. The Lower Assay Limit (LAL) is defined as each assay's working sensitivity in plasma as defined by the lowest concentration calibrator used for quantitation. Values between the LDD and LAL are less precise and were set to the LAL for data mining. Two-tailed student's *t*-test was used to compare diet-dependent protein expression levels and values of  $P < 0.05$  were considered to be statistically significant.

### Quantitative analysis of redox active compounds in colon tissues

The concentrations of selected redox active compounds were measured using a Perkin-Elmer HPLC equipped with an 8 channel coulometric array detector (ESA) (6). Frozen colonic segments from 6 animals fed the WD or the control diet for 6 mo were homogenized in 5 volumes of cold PBS (weight/volume) and a 50  $\mu$ L aliquot was mixed with 15  $\mu$ L of 25% solution of metaphosphoric acid. Samples were allowed to stand for 15 minutes at 4 °C and were centrifuged at 10,000-x g for 10 minutes to sediment protein. Cell pellet precipitates were dissolved in 0.1 mol/L NaOH and saved for protein determinations by a spectrophotometric quantitation method using BCA reagent (Pierce Chemical). The concentrations of redox sensitive compounds in the supernatant fractions were determined by injecting 5  $\mu$ L aliquots onto an Ultrasphere 5 u, 4.6 x 250 mm, C18 column and eluting with a mobile phase of 50 mmol/L  $\text{NaH}_2\text{PO}_4$ , 0.05 mmol/L octane sulfonic acid, 2% acetonitrile (pH 2.62) at a flow rate of 1 mL/min. The 8-channel CoulArray detectors were set at 200, 350, 400, 450, 500, 550, 600 and 700 mV, respectively. Peak areas were analyzed using ESA, Inc. software. The concentrations of redox active compounds in the samples were compared against standards for each derivative (cysteine, cystine, ascorbate, methionine, glutathione, oxidized glutathione, and uric acid) and were reported as nmol/mg protein. The range of concentrations of each standard curve was 10 to 200 pmol/L.

### Literature cited

1. Ingenuity Pathway Analysis Software- Complete Pathway Database (April, 2009), <http://www.ingenuity.com/>.
2. DAVID 2008 Functional Annotation Bioinformatics Microarray Analysis (December, 2008), <http://david.abcc.ncifcrf.gov/>.
3. Gene Set Enrichment Analysis (December, 2008), <http://www.broad.mit.edu/gsea/>.
4. Gene Set Enrichment Analysis/ Molecular Signatures Database/ Browse Collections (December, 2008), <http://www.broad.mit.edu/gsea/msigdb/collections.jsp>.
5. Rules-Based Medicine, Inc: The Biomarker Testing Laboratory (June, 2008) <http://www.rulesbasedmedicine.com>.

## Online Supporting Material

6. Pinto JT, Van Raamsdonk JM, Leavitt BR, Hayden MR, Jeitner TM., Thaler HT, Krasnikov BF, Cooper AJ. Treatment of YAC128 mice and their wild-type littermates with cystamine does not lead to its accumulation in plasma or brain: implications for the treatment of Huntington disease. *J Neurochem.* 2005;94:1087-101.

## Online Supporting Material

**Supplemental Table 1.** Diet Compositions<sup>1,2</sup>

| Ingredients                     | AIN-76A     | WD          |
|---------------------------------|-------------|-------------|
| Fat (corn oil), %               | 5 (13)      | 20 (40)     |
| Calcium, mg/g                   | 5 (2700)    | 0.5 (220)   |
| Cholecalciferol $\mu\text{g/g}$ | 0.025 (600) | 0.0125 (50) |
| Phosphorus, mg/g                | 4 (2200)    | 3.6 (1600)  |
| Fiber (cellulose), %            | 5 (25)      | 5 (25)      |
| Folic acid, g/g                 | 2 (1100)    | 2 (1100)    |
| <b>kJ/g (approximate)</b>       | <b>3.6</b>  | <b>4.5</b>  |

<sup>1</sup>Numbers in parenthesis are the calculated equivalents, based on nutrient density, in a daily human 2000 kJ diet. <sup>2</sup>Modified from reference (18).

## Online Supporting Material

**Supplemental Table 2.** Custom Gene Lists related to oxidative stress used in GSEA

---

Gene Symbols

---

SCD1, GPX2, GPX3, APOE, NCF2, NOS2, ALS2, DUOX1, RAG2, PRDX4, MPP4, SLC41A3, EPX, AASS, TPO, IL19, KIF9, GPX5, UCP3, TMOD1, NUDT15, ZMYND17, CYBA, EHD2, MPO, SOD3, GPX7, LPO, RECQL4, PRDX2, PARK7, IL22, XPA, PRDX6-RS1, CTSB, SERPINB1B, APC, TXNRD2, PRDX1, FMO2, GPX6, NOX1, GPX1, NOX4, NXN, PRDX5, ERCC2, CCS, GPX4, PRNP, NOXO1, TXNRD3, GSR, PRDX6, GAB1, SOD1, PSMB5, PRDX3, PTGS2, TXNRD1, NOXA1, PTGS1, CAT, IDH1, PPP1R15B, NQO1

---

## Online Supporting Material

**Supplemental Table 3.** Expression of 11 genes in the colon of WD fed mice compared to controls at 3 and 6 months identified by microarray and validated by qPCR<sup>1</sup>

| Gene symbol          | Time points |        |            |       | TaqMan® Gene Expression Assays |
|----------------------|-------------|--------|------------|-------|--------------------------------|
|                      | 3 months    |        | 6 months   |       |                                |
|                      | Microarray  | qPCR   | Microarray | qPCR  |                                |
| Fold                 |             |        |            |       |                                |
| <b>Upregulated</b>   |             |        |            |       |                                |
| Mt2                  | 3.44        | 3.48   |            |       | <a href="#">Mm00809556_s1</a>  |
| Per2                 | 1.89        | 2.06   | 1.98       | 2.61  | <a href="#">Mm00478113_m1</a>  |
| Gsta2                | 1.49        | 1.32   | 1.45       | 1.13  | <a href="#">Mm00833353_mH</a>  |
| Cyp4b1               | 1.72        | 1.79   | 1.72       | 2.05  | <a href="#">Mm00484138_m1</a>  |
| Sqle                 | 1.59        | 1.89   | 1.40       | 1.41  | <a href="#">Mm00436772_m1</a>  |
| Tef                  | 1.94        | 2.06   | 1.79       | 2.12  | <a href="#">Mm00457513_m1</a>  |
| <b>Downregulated</b> |             |        |            |       |                                |
| Scd1                 | -4.42       | -10.20 | -1.72      | -1.59 | <a href="#">Mm00772290_m1</a>  |
| Lox                  | -1.48       | -2.00  | -1.52      | -2.16 | <a href="#">Mm00495386_m1</a>  |
| Arntl                | -1.59       | -2.27  | -1.65      | -2.06 | <a href="#">Mm00500226_m1</a>  |
| Hsp110               | -1.74       | -2.11  |            | -1.36 | <a href="#">Mm00442864_m1</a>  |
| Spon2                | -2.15       | -2.10  |            | -1.68 | <a href="#">Mm00513596_m1</a>  |

<sup>1</sup>Data are expressed as fold change and are means; n=8 for microarray and n=4 for qPCR analyzes.

## Online Supporting Material

**Supplemental Table 4.** Differentially expressed genes in the colon of WD fed C57Bl/6 mice at both the 3 mo (n=8) and 6 mo (n=8) time points<sup>1</sup>

| Gene Symbol   | RefSeq    | 3 months<br>Fold | 6 months<br>Fold | Description                                                                      | Gene Ontology                                                                                                                                                                                                                  |
|---------------|-----------|------------------|------------------|----------------------------------------------------------------------------------|--------------------------------------------------------------------------------------------------------------------------------------------------------------------------------------------------------------------------------|
| Entpd5        | NM_007647 | 1.29             | 1.23             | Mus musculus ectonucleoside triphosphate diphosphohydrolase 5 (Entpd5) mRNA.     |                                                                                                                                                                                                                                |
| Gsta2         | NM_008181 | 1.43             | 1.37             | Mus musculus glutathione S-transferase alpha 1 (Ya) (Gsta1) mRNA.                | GO:6749(glutathione metabolism)                                                                                                                                                                                                |
| Gsta2         | NM_008182 | 1.49             | 1.45             | Mus musculus glutathione S-transferase alpha 2 (Yc2) (Gsta2) mRNA.               |                                                                                                                                                                                                                                |
| Gstp1         | NM_013541 | 1.29             | 1.25             | Mus musculus glutathione S-transferase pi 1 (Gstp1) mRNA.                        | GO:6749(glutathione metabolism);<br>GO:8152(metabolism)                                                                                                                                                                        |
| Gsta2         | NM_008182 | 1.41             | 1.33             | Mus musculus glutathione S-transferase alpha 2 (Yc2) (Gsta2) mRNA.               |                                                                                                                                                                                                                                |
| Fgfbp1        | NM_008009 | 1.24             | 1.24             | Mus musculus fibroblast growth factor binding protein 1 (Fgfbp1) mRNA.           | GO:6355(regulation of transcription, DNA-dependent)                                                                                                                                                                            |
| Gstp1         | NM_013541 | 1.32             | 1.27             | Mus musculus glutathione S-transferase pi 1 (Gstp1) mRNA.                        | GO:6749(glutathione metabolism);<br>GO:8152(metabolism)<br>GO:6695(cholesterol biosynthesis);<br>GO:8203(cholesterol metabolism);<br>GO:8610(lipid biosynthesis); GO:6694(steroid biosynthesis); GO:16126(sterol biosynthesis) |
| Nsdhl         | NM_010941 | 1.2              | 1.26             | Mus musculus NAD(P) dependent steroid dehydrogenase-like (Nsdhl) mRNA.           |                                                                                                                                                                                                                                |
| Aard          | NM_175503 | 1.23             | 1.24             | Mus musculus alanine and arginine rich domain containing protein (Aard) mRNA.    | GO:4(biological process unknown)                                                                                                                                                                                               |
| AI842788      | NM_198616 | 1.22             | 1.25             | Expressed sequence AI842788 (AI842788), mRNA                                     |                                                                                                                                                                                                                                |
| Cndp2         | NM_023149 | 1.23             | 1.22             | Mus musculus CNDP dipeptidase 2 (metallopeptidase M20 family) (Cndp2) mRNA.      | GO:6508(proteolysis)                                                                                                                                                                                                           |
| 1500041J02Rik | NM_026424 | 1.3              | 1.42             | Mus musculus RIKEN cDNA 1500041J02 gene (1500041J02Rik) mRNA.                    |                                                                                                                                                                                                                                |
| Cyp4f16       | NM_024442 | 1.22             | 1.47             | Mus musculus cytochrome P450 family 4 subfamily f polypeptide 16 (Cyp4f16) mRNA. | GO:6118(electron transport)<br>GO:6695(cholesterol biosynthesis);<br>GO:8610(lipid biosynthesis);<br>GO:8152(metabolism); GO:6694(steroid biosynthesis)                                                                        |
| Hsd17b7       | NM_010476 | 1.37             | 1.21             | Mus musculus hydroxysteroid (17-beta) dehydrogenase 7 (Hsd17b7) mRNA.            |                                                                                                                                                                                                                                |
| Per2          | NM_011066 | 1.89             | 1.98             | Mus musculus period homolog 2 (Drosophila)                                       | GO:7623(circadian rhythm);                                                                                                                                                                                                     |



## Online Supporting Material

|               |           |      |      |                                                                               |                                                                                                                                                                                                                                                                         |
|---------------|-----------|------|------|-------------------------------------------------------------------------------|-------------------------------------------------------------------------------------------------------------------------------------------------------------------------------------------------------------------------------------------------------------------------|
|               |           |      |      | (Per2) mRNA.                                                                  | GO:6355(regulation of transcription, DNA-dependent); GO:48511(rhythmic process); GO:7165(signal transduction); GO:6350(transcription); GO:160(two-component signal transduction system (phosphorelay))                                                                  |
| Ngef          | NM_019867 | 1.25 | 1.23 | Mus musculus neuronal guanine nucleotide exchange factor (Ngef) mRNA.         | GO:50875(cellular physiological process)                                                                                                                                                                                                                                |
| Pcsk9         | NM_153565 | 1.52 | 1.4  | Mus musculus proprotein convertase subtilisin/kexin type 9 (Pcsk9) mRNA.      | GO:8203(cholesterol metabolism); GO:6629(lipid metabolism); GO:43086(negative regulation of enzyme activity); GO:30182(neuron differentiation); GO:6508(proteolysis); GO:8202(steroid metabolism)                                                                       |
| Akr1b8        | NM_008012 | 1.26 | 1.34 | Mus musculus aldo-keto reductase family 1 member B8 (Akr1b8) mRNA.            |                                                                                                                                                                                                                                                                         |
| Dhcr7         | NM_007856 | 1.21 | 1.29 | Mus musculus 7-dehydrocholesterol reductase (Dhcr7) mRNA.                     | GO:1568(blood vessel development); GO:30154(cell differentiation); GO:6695(cholesterol biosynthesis); GO:8610(lipid biosynthesis); GO:30324(lung development); GO:42127(regulation of cell proliferation); GO:6694(steroid biosynthesis); GO:16126(sterol biosynthesis) |
| Tm4sf7        | NM_053082 | 1.25 | 1.54 | Mus musculus transmembrane 4 superfamily member 7 (Tm4sf7) mRNA.              |                                                                                                                                                                                                                                                                         |
| Dbp           | NM_016974 | 1.59 | 1.66 | Mus musculus D site albumin promoter binding protein (Dbp) mRNA.              | GO:7623(circadian rhythm); GO:6355(regulation of transcription, DNA-dependent); GO:48511(rhythmic process); GO:6350(transcription)                                                                                                                                      |
| Sc4mol        | NM_025436 | 1.51 | 1.35 | Mus musculus sterol-C4-methyl oxidase-like (Sc4mol) mRNA.                     | GO:8610(lipid biosynthesis); GO:8152(metabolism); GO:6694(steroid biosynthesis); GO:16126(sterol biosynthesis)                                                                                                                                                          |
| 4931406C07Rik | NM_133732 | 1.49 | 1.51 | Mus musculus RIKEN cDNA 4931406C07 gene (4931406C07Rik) mRNA.                 |                                                                                                                                                                                                                                                                         |
| Creb3l3       | NM_145365 | 1.49 | 1.42 | Mus musculus cAMP responsive element binding protein 3-like 3 (Creb3l3) mRNA. |                                                                                                                                                                                                                                                                         |
| Dp11l         | NM_139292 | 1.24 | 1.25 | Mus musculus deleted in polyposis 1-like 1                                    |                                                                                                                                                                                                                                                                         |

## Online Supporting Material

|               |           |       |       |                                                                                                                    |                                                                                                                                                                                                                                                                                                                                                         |
|---------------|-----------|-------|-------|--------------------------------------------------------------------------------------------------------------------|---------------------------------------------------------------------------------------------------------------------------------------------------------------------------------------------------------------------------------------------------------------------------------------------------------------------------------------------------------|
| Tef           | NM_017376 | 1.94  | 1.79  | (Dp111) mRNA.<br>Mus musculus thyrotroph embryonic factor (Tef) transcript variant 2 mRNA.                         | GO:45944(positive regulation of transcription from RNA polymerase II promoter);<br>GO:6355(regulation of transcription, DNA-dependent); GO:48511(rhythmic process);<br>GO:6350(transcription)<br>GO:6118(electron transport);<br>GO:8152(metabolism)                                                                                                    |
| Sqle          | NM_009270 | 1.59  | 1.4   | Mus musculus squalene epoxidase (Sqle) mRNA.                                                                       | GO:8152(metabolism)                                                                                                                                                                                                                                                                                                                                     |
| Cbr3          | NM_173047 | 1.4   | 1.38  | Mus musculus carbonyl reductase 3 (Cbr3) mRNA.                                                                     | GO:8152(metabolism)                                                                                                                                                                                                                                                                                                                                     |
| Aldh1a7       | NM_011921 | 1.26  | 1.48  | Mus musculus aldehyde dehydrogenase family 1 subfamily A7 (Aldh1a7) mRNA.                                          | GO:8152(metabolism); GO:42574(retinal metabolism)                                                                                                                                                                                                                                                                                                       |
| Mid1ip1       | NM_026524 | 1.22  | 1.31  | Mid1 interacting protein 1 (gastrulation specific G12-like (zebrafish)), mRNA (cDNA clone MGC:18710 IMAGE:4215464) | GO:7026(negative regulation of microtubule depolymerization)                                                                                                                                                                                                                                                                                            |
| AI987692      | NM_177912 | -1.32 | -2.54 | Mus musculus expressed sequence AI987692 (AI987692) mRNA.                                                          |                                                                                                                                                                                                                                                                                                                                                         |
| Eln           | NM_007925 | -1.4  | -1.34 | Mus musculus elastin (Eln) mRNA.                                                                                   | GO:30833(regulation of actin filament polymerization); GO:43149(stress fiber formation); GO:7519(striated muscle development)                                                                                                                                                                                                                           |
| Ifi202b       | NM_172648 | -1.23 | -1.31 | Mus musculus interferon activated gene 205 (Ifi205) mRNA.                                                          |                                                                                                                                                                                                                                                                                                                                                         |
| 9030623N16Rik | NM_025777 | -1.31 | -1.84 | Mus musculus RIKEN cDNA 9030623N16 gene (9030623N16Rik) mRNA.                                                      |                                                                                                                                                                                                                                                                                                                                                         |
| Arntl         | NM_007489 | -1.59 | -1.65 | Mus musculus aryl hydrocarbon receptor nuclear translocator-like (Arntl) mRNA.                                     | GO:7623(circadian rhythm); GO:60(protein import into nucleus, translocation);<br>GO:42176(regulation of protein catabolism);<br>GO:45449(regulation of transcription);<br>GO:6355(regulation of transcription, DNA-dependent); GO:7165(signal transduction);<br>GO:6350(transcription); GO:160(two-component signal transduction system (phosphorelay)) |
| Col4a1        | NM_009931 | -1.26 | -1.34 | Mus musculus procollagen type IV alpha 1 (Col4a1) mRNA.                                                            | GO:7155(cell adhesion); GO:6817(phosphate transport)                                                                                                                                                                                                                                                                                                    |

## Online Supporting Material

|               |           |       |       |                                                                                   |                                                                                                                                                                                                                                                                                                                                                                          |
|---------------|-----------|-------|-------|-----------------------------------------------------------------------------------|--------------------------------------------------------------------------------------------------------------------------------------------------------------------------------------------------------------------------------------------------------------------------------------------------------------------------------------------------------------------------|
| Nfil3         | NM_017373 | -1.34 | -2.09 | Mus musculus nuclear factor interleukin 3 regulated (Nfil3) mRNA.                 | GO:6355(regulation of transcription, DNA-dependent)                                                                                                                                                                                                                                                                                                                      |
| Slc39a4       | NM_028064 | -1.27 | -1.36 | Mus musculus solute carrier family 39 (zinc transporter) member 4 (Slc39a4) mRNA. | GO:6811(ion transport); GO:30001(metal ion transport); GO:6810(transport); GO:6882(zinc ion homeostasis); GO:6829(zinc ion transport)                                                                                                                                                                                                                                    |
| Tfrc          | NM_011638 | -1.33 | -1.5  | Mus musculus transferrin receptor (Tfrc) mRNA.                                    | GO:6897(endocytosis); GO:6879(iron ion homeostasis); GO:6508(proteolysis)                                                                                                                                                                                                                                                                                                |
| Lox           | NM_010728 | -1.48 | -1.52 | Mus musculus lysyl oxidase (Lox) mRNA.                                            |                                                                                                                                                                                                                                                                                                                                                                          |
| Scd1          | NM_009127 | -4.42 | -1.72 | Mus musculus stearyl-Coenzyme A desaturase 1 (Scd1) mRNA.                         | GO:6633(fatty acid biosynthesis); GO:8610(lipid biosynthesis); GO:6801(superoxide metabolism)                                                                                                                                                                                                                                                                            |
| Ctgf          | NM_010217 | -1.37 | -1.2  | Mus musculus connective tissue growth factor (Ctgf) mRNA.                         | GO:6260(DNA replication); GO:1525(angiogenesis); GO:1502(cartilage condensation); GO:7155(cell adhesion); GO:30154(cell differentiation); GO:16477(cell migration); GO:7160(cell-matrix adhesion); GO:8543(fibroblast growth factor receptor signaling pathway); GO:7229(integrin-mediated signaling pathway); GO:1503(ossification); GO:1558(regulation of cell growth) |
| 2900041A09Rik | NM_182839 | -1.3  | -1.6  | Mus musculus RIKEN cDNA 2900041A09 gene (2900041A09Rik) mRNA.                     | GO:6118(electron transport)                                                                                                                                                                                                                                                                                                                                              |

<sup>1</sup>Data were generated by GeneSifter Microarray analysis restricting analysis to genes with signal intensities greater than 0.95. 1.2 fold cutoff was applied and pairwise statistical analysis was performed using Student's t-test ( $P$ -value < 0.05).

## Online Supporting Material

**Supplemental Table 5.** Biological function GO categories over-represented in the colon of mice after 3 mo (n=8) or 6 mo (n=8) feeding of WD<sup>1</sup>

| 3 month<br>GO                                | Fold     | 6 month<br>GO                                          | Fold     |
|----------------------------------------------|----------|--------------------------------------------------------|----------|
| angiogenesis                                 | 3.69*    | angiogenesis                                           | 2.80     |
| carboxylic acid metabolism                   | 2.26*    | carboxylic acid metabolism                             | 1.94*    |
| cellular lipid metabolism                    | 3.56***  | cellular lipid metabolism                              | 2.40***  |
| lipid biosynthesis                           | 5.80***  | lipid biosynthesis                                     | 3.20***  |
| steroid biosynthesis                         | 13.89*** | steroid biosynthesis                                   | 6.30***  |
| steroid metabolism                           | 7.57***  | steroid metabolism                                     | 3.27**   |
| sterol metabolism                            | 12.71*** | sterol metabolism                                      | 7.32***  |
| blood vessel morphogenesis                   | 3.68*    | anion transport                                        | 2.47*    |
| cation homeostasis                           | 5.38**   | antigen presentation,<br>exogenous antigen             | 6.00*    |
| cell growth                                  | 4.95**   | chemotaxis                                             | 5.29***  |
| coenzyme metabolism                          | 3.15*    | complement activation                                  | 5.02*    |
| electron transport                           | 2.19*    | cytokine and chemokine<br>mediated signaling pathway   | 6.00*    |
| fluid secretion                              | 55.50*   | cytokine biosynthesis                                  | 4.35*    |
| glutathione metabolism                       | 16.00**  | cytokine metabolism                                    | 4.28*    |
| isoprenoid biosynthesis                      | 19.20**  | cytokine production                                    | 4.15*    |
| isoprenoid metabolism                        | 14.50**  | humoral defense mechanism                              | 5.22**   |
| nitric oxide mediated signal<br>transduction | 41.70*   | immune cell activation                                 | 2.87*    |
| positive regulation of cell<br>proliferation | 3.70*    | immune cell chemotaxis                                 | 9.00*    |
| regulation of cell size                      | 4.80**   | inflammatory response                                  | 4.10***  |
|                                              |          | innate immune response                                 | 6.23**   |
|                                              |          | lymphocyte differentiation                             | 3.75*    |
|                                              |          | mast cell activation                                   | 17.99**  |
|                                              |          | myeloid cell differentiation                           | 4.32*    |
|                                              |          | negative regulation of myeloid<br>cell differentiation | 15.87*** |
|                                              |          | negative regulation of protein<br>kinase activity      | 6.75*    |

## Online Supporting Material

|                                                |         |
|------------------------------------------------|---------|
| negative regulation of protein metabolism      | 4.09*   |
| positive regulation of biosynthesis            | 4.69*   |
| positive regulation of immune response         | 4.55**  |
| positive regulation of protein kinase activity | 4.91*   |
| positive regulation of protein metabolism      | 4.09*   |
| positive regulation of signal transduction     | 5.14*   |
| regulation of endocytosis                      | 6.17*   |
| regulation of immune response                  | 3.30**  |
| regulation of protein kinase activity          | 4.15**  |
| regulation of protein metabolism               | 3.23*** |
| thymic T cell selection                        | 11.57*  |

---

<sup>1</sup>The enrichment *P*-values were calculated using modified Fisher's exact test with Bonferroni adjustment for multiple testing. \* Different from control,  $P < 0.05$ ; \*\*  $P < 0.01$ , \*\*\*  $P < 0.001$ .

## Online Supporting Material

**Supplemental Table 6.** Canonical pathways significantly altered by the WD (n=8) in the colon of C57Bl/6 mice compared to controls (n=8) at 3 months or 6 months<sup>1,2</sup>

| 3 month                                      |                    |             |                                                                  |           |          |
|----------------------------------------------|--------------------|-------------|------------------------------------------------------------------|-----------|----------|
| Signaling Pathways                           | Ratio <sup>3</sup> | Gene Symbol | Description                                                      | RefSeq    | Fold     |
| LPS/IL-1 Mediated Inhibition of RXR Function | 10/170***          | ABCC3       | ATP-binding cassette, sub-family C (CFTR/MRP), member 3          | XM_358306 | 1.219**  |
|                                              |                    | ALDH1B1     | aldehyde dehydrogenase 1 family, member B1                       | NM_028270 | 1.369*** |
|                                              |                    | FABP6       | fatty acid binding protein 6, ileal (gastrotropin)               | NM_008375 | 1.226*   |
|                                              |                    | FMO5        | flavin containing monooxygenase 5                                | NM_010232 | 1.307*   |
|                                              |                    | GSTA4       | glutathione S-transferase A4                                     | NM_010357 | 1.406*** |
|                                              |                    | GSTA5       | glutathione S-transferase A5                                     | NM_008182 | 1.486*** |
|                                              |                    | GSTO1       | glutathione S-transferase omega 1                                | NM_010362 | 1.201*** |
|                                              |                    | GSTP1       | glutathione S-transferase pi                                     | NM_013541 | 1.317*** |
|                                              |                    | HMGCS1      | 3-hydroxy-3-methylglutaryl-Coenzyme A synthase 1 (soluble)       | NM_145942 | 1.574*** |
|                                              |                    | HMGCS2      | 3-hydroxy-3-methylglutaryl-Coenzyme A synthase 2 (mitochondrial) | NM_008256 | 1.478**  |
| Nrf-2 Mediated Oxidative Stress Response     | 8/142***           | ACTA2       | actin, alpha 2, smooth muscle, aorta                             | NM_007392 | 1.219**  |

## Online Supporting Material

|                                 |         |         |                                                                  |           |           |
|---------------------------------|---------|---------|------------------------------------------------------------------|-----------|-----------|
|                                 |         | GCLM    | glutamate-cysteine ligase, modifier subunit                      | NM_008129 | 1.369***  |
|                                 |         | GSTA4   | glutathione S-transferase A4                                     | NM_010357 | 1.226*    |
|                                 |         | GSTA5   | glutathione S-transferase A5                                     | NM_008182 | 1.307*    |
|                                 |         | GSTO1   | glutathione S-transferase omega 1                                | NM_010362 | 1.406***  |
|                                 |         | GSTP1   | glutathione S-transferase pi                                     | NM_013541 | 1.486***  |
|                                 |         | HMOX1   | heme oxygenase (decycling) 1                                     | NM_010442 | 1.201***  |
|                                 |         | STIP1   | stress-induced-phosphoprotein 1 (Hsp70/Hsp90-organizing protein) | NM_016737 | 1.317***  |
| Circadian rhythm signaling      | 4/31*** | ARNTL   | aryl hydrocarbon receptor nuclear translocator-like              | NM_007489 | -1.589*** |
|                                 |         | CLOCK   | clock homolog (mouse)                                            | NM_007715 | -1.207**  |
|                                 |         | NR1D1   | nuclear receptor subfamily 1, group D, member 1                  | NM_145434 | -1.234*   |
|                                 |         | PER2    | period homolog 2 (Drosophila)                                    | NM_011066 | 1.895***  |
| Xenobiotic Metabolism Signaling | 8/228** | ABCC3   | ATP-binding cassette, sub-family C (CFTR/MRP), member 3          | XM_358306 | 1.219**   |
|                                 |         | ALDH1B1 | aldehyde dehydrogenase 1 family, member B1                       | NM_028270 | 1.369***  |
|                                 |         | FMO5    | flavin containing monooxygenase 5                                | NM_010232 | 1.307*    |
|                                 |         | GSTA4   | glutathione S-transferase A4                                     | NM_010357 | 1.406***  |
|                                 |         | GSTA5   | glutathione S-transferase A5                                     | NM_008182 | 1.486***  |
|                                 |         | GSTO1   | glutathione S-transferase omega 1                                | NM_010362 | 1.201***  |
|                                 |         | GSTP1   | glutathione S-transferase pi                                     | NM_013541 | 1.317***  |

## Online Supporting Material

| Aryl Hydrocarbon receptor signaling | 6/147**  | HMOX1       | heme oxygenase (decycling) 1                        | NM_010442 | 1.684*    |
|-------------------------------------|----------|-------------|-----------------------------------------------------|-----------|-----------|
|                                     |          | ALDH1B1     | aldehyde dehydrogenase 1 family, member B1          | NM_028270 | 1.369***  |
|                                     |          | CCND2       | cyclin D2                                           | NM_009829 | -1.221*   |
|                                     |          | GSTA4       | glutathione S-transferase A4                        | NM_010357 | 1.406***  |
|                                     |          | GSTA5       | glutathione S-transferase A5                        | NM_008182 | 1.486***  |
|                                     |          | GSTO1       | glutathione S-transferase omega 1                   | NM_010362 | 1.201***  |
| IGF1-Signaling                      | 4/90*    | GSTP1       | glutathione S-transferase pi                        | NM_013541 | 1.317***  |
|                                     |          | CTGF        | connective tissue growth factor                     | NM_010217 | -1.37**   |
|                                     |          | IGFBP2      | insulin-like growth factor binding protein 2, 36kDa | NM_008342 | -1.203*   |
|                                     |          | IGFBP4      | insulin-like growth factor binding protein 4        | NM_010517 | -1.233*** |
|                                     |          | SFN         | stratifin                                           | NM_018754 | -1.227**  |
| Metabolic Pathways                  | Ratio    | Gene Symbol | Description                                         |           | Fold      |
| Glutathione Metabolism              | 6/102*** | GCLM        | glutamate-cysteine ligase, modifier subunit         | NM_008129 | 1.231*    |
|                                     |          | GSTA4       | glutathione S-transferase A4                        | NM_010357 | 1.406***  |
|                                     |          | GSTA5       | glutathione S-transferase A5                        | NM_008182 | 1.486***  |
|                                     |          | GSTO1       | glutathione S-transferase omega 1                   | NM_010362 | 1.201***  |
|                                     |          | GSTP1       | glutathione S-transferase pi                        | NM_013541 | 1.317***  |
|                                     |          | IDH1        | isocitrate dehydrogenase 1 (NADP+), soluble         | NM_010497 | 1.278**   |



## Online Supporting Material

|                           |          |         |                                                                                                                           |           |          |
|---------------------------|----------|---------|---------------------------------------------------------------------------------------------------------------------------|-----------|----------|
| Butanoate Metabolism      | 6/127*** | AACS    | acetoacetyl-CoA synthetase                                                                                                | NM_030210 | 1.481*** |
|                           |          | ALDH1A7 | aldehyde dehydrogenase family 1, subfamily A7                                                                             | NM_011921 | 1.257*** |
|                           |          | ALDH1B1 | aldehyde dehydrogenase 1 family, member B1                                                                                | NM_028270 | 1.369*** |
|                           |          | HMGCS1  | 3-hydroxy-3-methylglutaryl-Coenzyme A synthase 1 (soluble)                                                                | NM_145942 | 1.574*** |
|                           |          | HMGCS2  | 3-hydroxy-3-methylglutaryl-Coenzyme A synthase 2 (mitochondrial)                                                          | NM_008256 | 1.478*   |
|                           |          | ILVBL   | ilvB (bacterial acetolactate synthase)-like                                                                               | NM_173751 | 1.204*** |
| Biosynthesis of Steroids  | 6/127**  | DHCR7   | 7-dehydrocholesterol reductase                                                                                            | NM_007856 | 1.206*** |
|                           |          | FDPS    | farnesyl diphosphate synthase (farnesyl pyrophosphate synthetase, dimethylallyltranstransferase, geranyltranstransferase) | NM_134469 | 1.295*   |
|                           |          | HMGCR   | 3-hydroxy-3-methylglutaryl-Coenzyme A reductase                                                                           | XM_127496 | 1.249*   |
|                           |          | LSS     | lanosterol synthase (2,3-oxidosqualene-lanosterol cyclase)                                                                | NM_146006 | 1.484*** |
|                           |          | MVD     | mevalonate (diphospho) decarboxylase                                                                                      | NM_138656 | 1.232*   |
|                           |          | SQLE    | squalene epoxidase                                                                                                        | NM_009270 | 1.587*** |
| Metabolism of Xenobiotics | 8/213**  | CYP2D10 | cytochrome P450, family 2, subfamily                                                                                      | NM_010005 | 1.281*   |

## Online Supporting Material

by Cytochrome P450

|         |                                                           |           |          |
|---------|-----------------------------------------------------------|-----------|----------|
|         | d, polypeptide 10                                         |           |          |
| CYP2D26 | cytochrome P450, family 2, subfamily<br>d, polypeptide 26 | NM_029562 | 1.567*   |
| CYP4B1  | cytochrome P450, family 4, subfamily<br>B, polypeptide 1  | NM_007823 | 1.724)   |
| CYP4F12 | cytochrome P450, family 4, subfamily<br>F, polypeptide 12 | NM_022434 | 1.409**  |
| GSTA4   | glutathione S-transferase A4                              | NM_010357 | 1.406*** |
| GSTA5   | glutathione S-transferase A5                              | NM_008182 | 1.486*** |
| GSTO1   | glutathione S-transferase omega 1                         | NM_010362 | 1.201*** |
| GSTP1   | glutathione S-transferase pi                              | NM_013541 | 1.317*** |

## Online Supporting Material

|                                         |         |         |                                                                                      |           |          |
|-----------------------------------------|---------|---------|--------------------------------------------------------------------------------------|-----------|----------|
| Fatty Acid Metabolism                   | 7/186** | ACAA2   | acetyl-Coenzyme A acyltransferase 2<br>(mitochondrial 3-oxoacyl-Coenzyme A thiolase) | NM_177470 | 1.242*** |
|                                         |         | ALDH1A7 | aldehyde dehydrogenase family 1, subfamily A7                                        | NM_011921 | 1.257*** |
|                                         |         | ALDH1B1 | aldehyde dehydrogenase 1 family, member B1                                           | NM_028270 | 1.369*** |
|                                         |         | CYP2D10 | cytochrome P450, family 2, subfamily d, polypeptide 10                               | NM_010005 | 1.281*   |
|                                         |         | CYP2D26 | cytochrome P450, family 2, subfamily d, polypeptide 26                               | NM_029562 | 1.567*   |
|                                         |         | CYP4B1  | cytochrome P450, family 4, subfamily B, polypeptide 1                                | NM_007823 | 1.724*   |
|                                         |         | CYP4F12 | cytochrome P450, family 4, subfamily F, polypeptide 12                               | NM_022434 | 1.409**  |
| Valine, Leucine, Isoleucine Degradation | 5/107** | ACAA2   | acetyl-Coenzyme A acyltransferase 2<br>(mitochondrial 3-oxoacyl-Coenzyme A thiolase) | NM_177470 | 1.242*** |
|                                         |         | ALDH1A7 | aldehyde dehydrogenase family 1, subfamily A7                                        | NM_011921 | 1.257*** |
|                                         |         | ALDH1B1 | aldehyde dehydrogenase 1 family, member B1                                           | NM_028270 | 1.369*** |
|                                         |         | HMGCS1  | 3-hydroxy-3-methylglutaryl-Coenzyme A synthase 1 (soluble)                           | NM_145942 | 1.574*** |
|                                         |         | HMGSC2  | 3-hydroxy-3-methylglutaryl-                                                          | NM_008256 | 1.478*   |

## Online Supporting Material

|                       |                                                                         |                                               |                                                                                                          |           |                                                                |
|-----------------------|-------------------------------------------------------------------------|-----------------------------------------------|----------------------------------------------------------------------------------------------------------|-----------|----------------------------------------------------------------|
| Tryptophan Metabolism | 7/237**                                                                 | ALDH1A7                                       | Coenzyme A synthase 2<br>(mitochondrial)<br>aldehyde dehydrogenase family 1,<br>subfamily A7             | NM_011921 | 1.257***                                                       |
|                       |                                                                         | ALDH1B1                                       | aldehyde dehydrogenase 1 family,<br>member B1                                                            | NM_028270 | 1.369***                                                       |
|                       |                                                                         | CCBL1                                         | cysteine conjugate-beta lyase;<br>cytoplasmic (glutamine transaminase<br>K, kynurenine aminotransferase) | NM_172404 | 1.467*                                                         |
|                       |                                                                         | CYP2D10                                       | cytochrome P450, family 2, subfamily<br>d, polypeptide 10                                                | NM_010005 | 1.281*                                                         |
|                       |                                                                         | CYP2D26                                       | cytochrome P450, family 2, subfamily<br>d, polypeptide 26                                                | NM_029562 | 1.567*                                                         |
|                       |                                                                         | CYP4B1                                        | cytochrome P450, family 4, subfamily<br>B, polypeptide 1                                                 | NM_007823 | 1.724*                                                         |
|                       |                                                                         | CYP4F12                                       | cytochrome P450, family 4, subfamily<br>F, polypeptide 12                                                | NM_022434 | 1.409**                                                        |
|                       |                                                                         | Synthesis and degradation<br>of ketone bodies | 2/19*                                                                                                    | HMGCS1    | 3-hydroxy-3-methylglutaryl-<br>Coenzyme A synthase 1 (soluble) |
| HMGSC2                | 3-hydroxy-3-methylglutaryl-<br>Coenzyme A synthase 2<br>(mitochondrial) |                                               |                                                                                                          | NM_008256 | 1.478*                                                         |

## Online Supporting Material

|                                              |        |                     |                                                                                                                                                                        |           |          |
|----------------------------------------------|--------|---------------------|------------------------------------------------------------------------------------------------------------------------------------------------------------------------|-----------|----------|
| Pyruvate Metabolism                          | 4/145* | AKR1B8              | --                                                                                                                                                                     | NM_008012 | 1.26*    |
|                                              |        | (includes EG:14187) |                                                                                                                                                                        |           |          |
|                                              |        | ALDH1A7             | aldehyde dehydrogenase family 1, subfamily A7                                                                                                                          | NM_011921 | 1.257*** |
|                                              |        | ALDH1B1             | aldehyde dehydrogenase 1 family, member B1                                                                                                                             | NM_028270 | 1.369*** |
| Glycosphingolipid biosynthesis - Lactoseries | 2/28*  | ME1                 | malic enzyme 1, NADP(+)-dependent, cytosolic                                                                                                                           | NM_008615 | -1.548*  |
|                                              |        | B3GNT5              | beta3Gn-T5, Lc3 Synthase                                                                                                                                               | NM_054052 | -1.271*  |
|                                              |        | ST3GAL4             | 2,3-Alpha Sialyltransferase, Alpha-2,3-sialyltransferase, Beta-galactosidase alpha-2,3-sialyltransferase, CGS23, FLJ11867, NANTA3, SAT3, SIAT4, SIAT4C, ST3GAL IV, STZ | NM_009178 | 1.267*   |
| Linoleic Acid Metabolism                     | 4/119* | CYP2D10             | cytochrome P450, family 2, subfamily d, polypeptide 10                                                                                                                 | NM_010005 | 1.281*   |
|                                              |        | CYP2D26             | cytochrome P450, family 2, subfamily d, polypeptide 26                                                                                                                 | NM_029562 | 1.567*   |
|                                              |        | CYP4B1              | cytochrome P450, family 4, subfamily B, polypeptide 1                                                                                                                  | NM_007823 | 1.724*   |

## Online Supporting Material

CYP4F12     cytochrome P450, family 4, subfamily  
F, polypeptide 12     NM\_022434     1.409\*\*

6 month

| Signaling Pathways                          | Ratio     | Gene<br>Symbol | Description                                             | RefSeq    | Fold     |
|---------------------------------------------|-----------|----------------|---------------------------------------------------------|-----------|----------|
| Nrf-2 Mediated Oxidative<br>Stress Response | 10/142*** | FOS            | v-fos FBJ murine osteosarcoma viral<br>oncogene homolog | NM_010234 | 1.794**  |
|                                             |           | JUNB           | jun B proto-oncogene                                    | NM_008416 | 1.235*   |
|                                             |           | CBR1           | carbonyl reductase 1                                    | NM_007620 | 1.265**  |
|                                             |           | GSTA3          | glutathione S-transferase A3                            | NM_010356 | 1.35*    |
|                                             |           | GSTA5          | glutathione S-transferase A5                            | NM_008182 | 1.451*** |
|                                             |           | GSTP1          | glutathione S-transferase pi                            | NM_013541 | 1.274*** |
|                                             |           | MGST3          | microsomal glutathione S-transferase<br>3               | NM_025569 | 1.26***  |
|                                             |           | NQO1           | NAD(P)H dehydrogenase, quinone 1                        | NM_008706 | 1.33**   |
|                                             |           | CREBBP         | CREB binding protein (Rubinstein-<br>Taybi<br>syndrome) | XM_148699 | -1.305** |
| Circadian rhythm signaling                  | 4/31**    | GPX2           | glutathione peroxidase 2<br>(gastrointestinal)          | NM_030677 | -1.379*  |
|                                             |           | PER1           | period homolog 1 (Drosophila)                           | NM_011065 | 1.37*    |
|                                             |           | PER2           | period homolog 2 (Drosophila)                           | NM_011066 | 1.982**  |
|                                             |           | CRY2           | cryptochrome 2 (photolyase-like)                        | NM_009963 | 1.495**  |
| T cell receptor signaling                   | 6/104**   | ARNTL          | aryl hydrocarbon receptor nuclear<br>translocator-like  | NM_007489 | -1.654** |
|                                             |           | FOS            | v-fos FBJ murine osteosarcoma viral<br>oncogene homolog | NM_010234 | 1.794**  |

## Online Supporting Material

|                                              |         |         |                                                                                   |           |           |
|----------------------------------------------|---------|---------|-----------------------------------------------------------------------------------|-----------|-----------|
| IGF1-Signaling                               | 5/90**  | PTPRH   | protein tyrosine phosphatase, receptor type, H                                    | NM_207270 | 1.218*    |
|                                              |         | LCP2    | lymphocyte cytosolic protein 2 (SH2 domain containing leukocyte protein of 76kDa) | NM_010696 | -1.286**  |
|                                              |         | PPP33C  | protein phosphatase 3 (formerly 2B), catalytic subunit, gamma isoform             | NM_008915 | -1.202*** |
|                                              |         | CD3D    | CD3d molecule, delta (CD3-TCR complex)                                            | NM_013487 | -1.435**  |
|                                              |         | CD3E    | CD3e molecule, epsilon (CD3-TCR complex)                                          | NM_007648 | -1.391*   |
|                                              |         | CTGF    | connective tissue growth factor                                                   | NM_010217 | 1.204*    |
|                                              |         | FOS     | v-fos FBJ murine osteosarcoma viral oncogene homolog                              | NM_010234 | 1.794**   |
|                                              |         | NEDD4   | neural precursor cell expressed, developmentally down-regulated 4                 | NM_010890 | 1.24**    |
| LPS/IL-1 Mediated Inhibition of RXR Function | 7/170** | NOV     | nephroblastoma overexpressed gene                                                 | NM_010930 | 1.84**    |
|                                              |         | IGF1    | insulin-like growth factor 1 (somatomedin C)                                      | NM_010512 | -1.254**  |
|                                              |         | SLC27A2 | solute carrier family 27 (fatty acid transporter), member 2                       | NM_011978 | 1.417**   |
|                                              |         | GSTA3   | glutathione S-transferase A3                                                      | NM_010356 | 1.35*     |
|                                              |         | GSTA5   | glutathione S-transferase A5                                                      | NM_008182 | 1.451***  |
|                                              |         | GSTP1   | glutathione S-transferase pi                                                      | NM_013541 | 1.274***  |
|                                              |         | MGST3   | microsomal glutathione S-transferase 3                                            | NM_025569 | 1.26***   |
|                                              |         | TLR4    | toll-like receptor 4                                                              | NM_021297 | -1.368*** |
| Complement Coagulation Cascade               | 4/70**  | ABCG1   | ATP-binding cassette, sub-family G (WHITE), member 1                              | NM_009593 | -1.342**  |
|                                              |         | C2      | complement component 2                                                            | NM_013484 | -1.608*   |
|                                              |         | C3      | complement component 3                                                            | NM_009778 | -1.553*   |

## Online Supporting Material

| Aryl Hydrocarbon receptor signaling | 6/147**                                                                                 | C1QB        | complement component 1, q subcomponent, B chain                              | NM_009777 | -1.228*   |
|-------------------------------------|-----------------------------------------------------------------------------------------|-------------|------------------------------------------------------------------------------|-----------|-----------|
|                                     |                                                                                         | CD55        | CD55 molecule, decay accelerating factor for complement (Cromer blood group) | NM_010016 | -1.364*   |
|                                     |                                                                                         | FOS         | v-fos FBJ murine osteosarcoma viral oncogene homolog                         | NM_010234 | 1.794**   |
|                                     |                                                                                         | GSTA3       | glutathione S-transferase A3                                                 | NM_010356 | 1.35*     |
|                                     |                                                                                         | GSTA5       | glutathione S-transferase A5                                                 | NM_008182 | 1.451***  |
|                                     |                                                                                         | GSTP1       | glutathione S-transferase pi                                                 | NM_013541 | 1.274***  |
| B cell Receptor Signaling           | 6/149**                                                                                 | MGST3       | microsomal glutathione S-transferase 3                                       | NM_025569 | 1.26***   |
|                                     |                                                                                         | NQO1        | NAD(P)H dehydrogenase, quinone 1                                             | NM_008706 | 1.33**    |
|                                     |                                                                                         | BCL2A1      | BCL2-related protein A1                                                      | NM_007534 | -1.475*   |
|                                     |                                                                                         | FCGR2A      | Fc fragment of IgG, low affinity IIa, receptor (CD32)                        | NM_010188 | -1.216*   |
|                                     |                                                                                         | FCGR2B      | Fc fragment of IgG, low affinity IIb, receptor (CD32)                        | NM_010187 | -1.234**  |
|                                     |                                                                                         | MAP3K6      | mitogen-activated protein kinase kinase kinase 6                             | NM_016693 | -1.381**  |
|                                     |                                                                                         | PPP3CC      | protein phosphatase 3 (formerly 2B), catalytic subunit, gamma isoform        | NM_008915 | -1.202*** |
| RAC2                                | ras-related C3 botulinum toxin substrate 2 (rho family, small GTP binding protein Rac2) | NM_009008   | -1.206*                                                                      |           |           |
| Metabolic Pathways                  | Ratio                                                                                   | Gene Symbol | Description                                                                  | RefSeq    | Fold      |
| Glutathione Metabolism              | 7/102***                                                                                | GPX2        | glutathione peroxidase 2 (gastrointestinal)                                  | NM_030677 | -1.379*   |
|                                     |                                                                                         | GSTA3       | glutathione S-transferase A3                                                 | NM_010356 | 1.35*     |
|                                     |                                                                                         | GSTA5       | glutathione S-transferase A5                                                 | NM_008182 | 1.451***  |



## Online Supporting Material

|                                            |        |         |                                                                                          |           |          |
|--------------------------------------------|--------|---------|------------------------------------------------------------------------------------------|-----------|----------|
|                                            |        | GSTM6   | glutathione S-transferase, mu 6                                                          | NM_008184 | 1.374*** |
|                                            |        | GSTP1   | glutathione S-transferase pi                                                             | NM_013541 | 1.274*** |
|                                            |        | H6PD    | hexose-6-phosphate dehydrogenase<br>(glucose 1- dehydrogenase)                           | NM_173371 | -1.256** |
|                                            |        | MGST3   | microsomal glutathione S-transferase<br>3                                                | NM_025569 | 1.26***  |
| Valine, Leucine, Isoleucine<br>Degradation | 5/107* | ACAA1B  | acetyl-Coenzyme A acyltransferase<br>1B                                                  | NM_146230 | 3.519**  |
|                                            |        | ACADS   | acyl-Coenzyme A dehydrogenase, C-<br>2 to C-3 short chain                                | NM_007383 | 1.246*   |
|                                            |        | ALDH1A7 | aldehyde dehydrogenase family 1,<br>subfamily A7                                         | NM_011921 | 1.483*** |
|                                            |        | BCAT2   | branched chain aminotransferase 2,<br>mitochondrial                                      | NM_009737 | -1.209*  |
|                                            |        | HMGCL   | 3-hydroxymethyl-3-methylglutaryl-<br>Coenzyme A lyase<br>(hydroxymethylglutaricaciduria) | NM_008254 | 1.266*   |
| Biosynthesis of Steroids                   | 5/127* | DHCR7   | 7-dehydrocholesterol reductase                                                           | NM_007856 | 1.289*   |
|                                            |        | MVK     | Mevalonate kinase (mevalonic<br>aciduria)                                                | NM_023556 | 1.229*   |
|                                            |        | NQO1    | NAD(P)H dehydrogenase, quinone 1                                                         | NM_008706 | 1.330**  |
|                                            |        | PMVK    | Phosphomevalonate kinase                                                                 | NM_026784 | 1.280*   |
|                                            |        | SQLE    | Squalene epoxidase                                                                       | NM_09270  | 1.395**  |

<sup>1</sup>Ingenuity canonical pathway analyses of 3 mo and 6 mo differentially expressed total data sets ( $P$ -value < 0.05, no FDR applied). <sup>2</sup>Fischer's exact test was used to calculate  $P$ -values. \* Different from control,  $P < 0.05$ ; \*\*  $P < 0.01$ , \*\*\*  $P < 0.001$ . <sup>3</sup>The ratio is calculated as the number of differentially expressed genes divided by the total number of genes that make up that pathway.

## Online Supporting Material

**Supplemental Table 7.** Biological networks in the colon of WD fed C57Bl/6 mice (n=8) compared to controls (n=8) at 3 and 6 mo<sup>1</sup>

A. Integrated dataset at 3 months

| Genes in Network differentially express                                                                                                                                                                                                           | Score <sup>2</sup> | Focus molecules | Functions                                                                                 |
|---------------------------------------------------------------------------------------------------------------------------------------------------------------------------------------------------------------------------------------------------|--------------------|-----------------|-------------------------------------------------------------------------------------------|
| ACTA2↓ <sup>3</sup> , ARNTL↓, CAV1↓, CCND2↓, CLOCK↓, COL1A1↓, DBP↑, EGFR↓, EIF2S2↑, ENAH↓, EPB41L3↑, GSTA5↑, GSTP1↑, HMGCS2↑, IGFBP2↓, IGFBP4↓, MT2A↑, MYOCD↓, NR1D1↓, NR1D2↑, PER2↑, PER3↑, PLAT↓, SERPINH1↓, SFRP1↓, TEF↑, TES↓, TSPAN4↑, USP2↑ | 54                 | 29              | Behavior, Nervous System Development and Function, Cancer                                 |
| AREG↓, ARG2↑, DUSP6↓, ELN↓, FBLN2↓, FBN1↓, FGF10↓, FGFBP1↑, GHR↓, GREM1↓, HMGCR↑, HMGCS1↑, HMOX1↑, KCNQ1↑, LOX↓, LOXL1↓, LSS↑, NDRG1↑, NFIL3↓, P2RY2↑, PLEKHA1↓, PPP1R1A↓, PTN↓, RGS1↓, SCD↓, TNFRSF12A↓                                          | 46                 | 26              | Dermatological Diseases and Conditions, Genetic Disorder, Tissue Development              |
| ANXA5↓, COL18A1↓, COL4A1↓, COL5A1↓, CTGF↓, E2F2↓, EDN1↓, GNAI1↓, LGALS1↓, LIG1↑, MCM4↑, MCM5↑, MCM6↑, MMP14↓, RGS4↓, SERPINF1↓, SLC9A3R1↑, TNFRSF17↑, TNFRSF11A↓, UHRF1↑, WEE1↑, YAP1↓                                                            | 36                 | 22              | Cardiovascular System Development and Function, Cancer, Cellular Growth and Proliferation |
| ACAA2↑, AQP4↓, CDR2↓, COL5A1↓, CPD↓, EMP3↓, GHR↓, ↑GPT, LOC63928↓, PDLIM2↑, PDLIM4↓, PLEKHB1↓, RFX2↓, SFRP1↓, ST3GAL4↑, STIP1↓, TFRC↓, TLE1↓, TLE4↓, TSPO↓                                                                                        | 32                 | 20              | Cancer, Cell Cycle, Reproductive System Disease                                           |
| ABCC3↑, AKR1B8 (includes EG:14187) ↑, CNDP2↑, CYP2D10↑, CYP2D26↑, CYP4B1↑, CYP4F12↑, FGFBP1↑, FMO5↑, GSTA4↑, GSTO1↑, HSD17B7↑, KRT7↑, ME1↓, PLEKHA6↓, PPP1R3C↓, PTGER3↓, RERG↓, SLC7A8↓, SPSB1↓                                                   | 32                 | 20              | Cell Morphology, Vitamin and Mineral Metabolism, Gene Expression                          |

## Online Supporting Material

|                                                                                                                                                                                                                                           |    |    |                                                                                     |
|-------------------------------------------------------------------------------------------------------------------------------------------------------------------------------------------------------------------------------------------|----|----|-------------------------------------------------------------------------------------|
| ALDH1A7↑, CXCL13↑, CYB5B↑, CYP2D10↑, ELOVL6↑, ENTPD5↑, FMO5↑, GCLM↑, LAMB3↑, MT1E↑, PDE8B↑, PPP1R3C↓, RETSAT↑, SC4MOL↑, SCD↓, SFRP1↓, SLC13A2↑, SQLE↑, STARD5↑                                                                            | 30 | 19 | Lipid Metabolism, Molecular Transport, Small Molecule Biochemistry                  |
| C13ORF15↓, CGI-38↓, CHAF1B↑, COL4A1↓, DMN↓, E2F2↓, FAH↓, HIST1H1C↓, HSPH1↓, IGFBP2↓, IGFBP4↓, MATN4↓, MCM4↑, PHLDA3↓, RORC↑, SFN↓, STOM↓, TMEM43↓, TPPP↓                                                                                  | 30 | 19 | Cell Cycle, Connective Tissue Development and Function, Cancer                      |
| C10ORF58↓, CENPA↓, COL4A1↓, CRYAB↓, CSRP1↓, DUSP6↓, HSPA4L↓, HTRA1↓, IGFBP4↓, KRT7↑, MTHFD1L↑, NNM1↓, PARP3↓, PDLIM4↓, SDF2↓, SRXN1↑                                                                                                      | 23 | 16 | Amino Acid Metabolism, Post-Translational Modification, Small Molecule Biochemistry |
| AACS↑, DHCR7↑, FA2H↑, FABP6↑, FDPS↑, IDH1↑, IGK↑, MVD↑, NSDHL↑, PCSK9↑, SC4MOL↑, SLC7A9↑, SQLE↑, UCP2↑                                                                                                                                    | 19 | 14 | Lipid Metabolism, Molecular Transport, Small Molecule Biochemistry                  |
| <hr/>                                                                                                                                                                                                                                     |    |    |                                                                                     |
| <b>B. Integrated dataset at 6 months</b>                                                                                                                                                                                                  |    |    |                                                                                     |
| ALDH1A7↑, DGAT2↑, DHCR7↑, FRZB↑, ID3↑, JUNB↑, KLF4↑, MVK↑, NSDHL↑, PCSK9↑, PF4↑, PMVK↑, PTPRH↑, SC4MOL↑, SREBF2↑, CCL8↓, CDC7↓, EXPI↓, FHL2↓, FST↓, GFPT2↓, IFI16↓, IGH-2↓, MSC↓, NFIL3↓, PDLIM5↓, SCD↓, TFRC↓, ZBTB16↓, POU2AF1↓, TCF12↓ | 54 | 31 | Lipid metabolism, Small Molecule Biochemistry, Gene Expression                      |
| ADD1↑, APLP1↑ (includes EG:333), CENTA1↑, CRY2↑, CTGF↑, DBP↑, DES↑, ES22↑, HOXA7↑, NOV↑, PDLIM2↑, PER1↑, PER2↑, SGK2↑, NPAS2↓, ARNTL↓, GF11↓, IDE↓,                                                                                       | 49 | 29 | Behavior, Nervous System Development and Function, Cell Signaling                   |

## Online Supporting Material

IGF1↓, IL7R↓, LCN2↓, LY86↓, LY6A↓, GPD2↓, PAPP A↓,  
PTK6↓, SERPINA3↓, SLPI↓, XDH↓

|                                                                                                                                                                                                         |    |    |                                                               |
|---------------------------------------------------------------------------------------------------------------------------------------------------------------------------------------------------------|----|----|---------------------------------------------------------------|
| COL8A1↑, FOS↑, GSTA3↑, GSTA5↑, GSTM6↑, GSTP1↑,<br>LMNA↑, MGST3↑, NQO1↑, PCYT2↑, CD86↓, ELN↓, GPR65↓,<br>HSP90B1↓, IL1RL1↓, KNG1 (includes EG:16644)↓, LCP2↓,<br>LOX↓, MSLN↓, OSMR↓, RAC2↓, SCIN↓, TLR4↓ | 35 | 23 | Cellular Compromise, Cell Signaling,<br>Amino Acid Metabolism |
|---------------------------------------------------------------------------------------------------------------------------------------------------------------------------------------------------------|----|----|---------------------------------------------------------------|

|                                                                                                                                                                                                            |    |    |                                                                                   |
|------------------------------------------------------------------------------------------------------------------------------------------------------------------------------------------------------------|----|----|-----------------------------------------------------------------------------------|
| DUSP8↑, DUSP16↑, GADD45A↑, MUC1↑, PIB5PA↑,<br>TSPAN4↑, RHOU↑, CD74↓ CD3D↓, CD3E↓, CD3EAP↓,<br>COL4A1↓, CSF2RB↓, FCGR2A↓, FCGR2B↓, GADD45G↓,<br>HYOU1↓, POLR1A↓, POLR1E↓, SH2D2A↓, TLR3↓, TRAT1↓,<br>TRIB3↓ | 35 | 23 | Cellular Development, Inflammatory<br>Disease, Skeletal and Muscular<br>Disorders |
|------------------------------------------------------------------------------------------------------------------------------------------------------------------------------------------------------------|----|----|-----------------------------------------------------------------------------------|

|                                                                                                                                                              |    |    |                                                  |
|--------------------------------------------------------------------------------------------------------------------------------------------------------------|----|----|--------------------------------------------------|
| ACAA1B↑, EMID1↑, KLF4↑, NGEF↑, LOX↓, LY6C↓,<br>NAPSA↓, RNF144↓, SLPI↓, SOCS1↓, STX11↓, SYNJ2↓,<br>TNFAIP2↓, WARS↓, ANXA13↓, BCAT2↓, BLM↓, H2AFX↓.<br>NUP210↓ | 26 | 19 | Cancer, Gene Expression, Cellular<br>Development |
|--------------------------------------------------------------------------------------------------------------------------------------------------------------|----|----|--------------------------------------------------|

|                                                                                                                                           |    |    |                                                                         |
|-------------------------------------------------------------------------------------------------------------------------------------------|----|----|-------------------------------------------------------------------------|
| AK1↑, ARPC1A↑, CBR1↑, CRIP1↑, LMNA↑, PPM1G↑,<br>RASD2↑, TRIP10↑, CEP55↓, CSN3↓, DLG7↓, IFI16↓, IL7R↓,<br>MPHOSPH1↓, NFIL3↓, RPRM↓, SESN1↓ | 22 | 17 | Cell Cycle, Cellular Assembly and<br>Organization, Cellular Development |
|-------------------------------------------------------------------------------------------------------------------------------------------|----|----|-------------------------------------------------------------------------|

---

### C. Upregulated genes at 3 months

---

|                                                                                                                                                                                                                                                                                                        |    |    |                                                                                  |
|--------------------------------------------------------------------------------------------------------------------------------------------------------------------------------------------------------------------------------------------------------------------------------------------------------|----|----|----------------------------------------------------------------------------------|
| ARG2, C10ORF119, CRY2, Cyclin A, DBP, E2f, EIF2S2,<br>Glutathione transferase, GST, GSTA2, GSTA4, GSTA5, GSTM2,<br>GSTM3 (includes EG:14864), GSTO1, GSTP1, Histone h3,<br>HMGCR, HMGCS1, HMOX1, KCNQ1, LIG1, MCM4, MCM5,<br>MCM6, MT1E, MT2A, MTF1, NDRG1, PDGF BB, PER2, PER3,<br>Pka, Pkc(s), UHRF1 | 42 | 21 | Amino Acid Metabolism, Cellular<br>Compromise, Vitamin and Mineral<br>Metabolism |
|--------------------------------------------------------------------------------------------------------------------------------------------------------------------------------------------------------------------------------------------------------------------------------------------------------|----|----|----------------------------------------------------------------------------------|

## Online Supporting Material

|                                                                                                                                                                                                                                                                                                                         |    |    |                                                                                     |
|-------------------------------------------------------------------------------------------------------------------------------------------------------------------------------------------------------------------------------------------------------------------------------------------------------------------------|----|----|-------------------------------------------------------------------------------------|
| <p>AACS, CFD, cholic acid, CYP2E1, CYP7A1, DHCR7, FA2H, FABP4, FABP6, fatty acid, FDPS, FGF19 (includes EG:9965), GH1, ID3, IDH1, IGK, INSIG1, LDLR, LSS, malonyl-coenzyme A, mevalonic acid, MVD, NSDHL, PCSK9, PPARGC1B, RETN, RORC, SC4MOL, SLC7A9, SQLE, SREBF1, SREBF2, sterol, TCF3, UCP2</p>                     | 29 | 16 | Lipid Metabolism, Small Molecule Biochemistry, Molecular Transport                  |
| <p>APOC3, ATP6V1B1, beta-estradiol, CBX5, CCDC85B, CDKN1A, CHAF1B, CLCN3, CTSB, CYP2D10, CYP2D26, CYP2E1, CYP4B1, CYP4F12, ELOVL6, EPB41L3, FGF19, HKDC1, HSD17B7, INS1, MCM3, MCM6, MT1E, NCOA5, NCOR1, NR1D1, NR1D2, OPRK1, ORC1L, PRLR, PRMT5, RETSAT, SLC9A3R1, SMARCA4, Unspecific monooxygenase</p>               | 29 | 16 | Cell Morphology, Cellular Development, Connective Tissue Development and Function   |
| <p>ACAA2, ADIPOR2, ADRB3, ALDH1A7, ALDH1B1, BIRC3, CA1 (includes EG:759), CBR3, CHST4, CTSD, CXCL13, CYP17A1, ENTPD5, ERBB2, F2, FOSB, GPT, IGF1, KRT7, L-triiodothyronine, LAMA3, LAMB3, LAMC2, LTA, LTB, MYLK, PDE8B, PDLIM2, PRDX2, PRKD1, PTHR1, SQLE, ST3GAL4, TNF, UCP2</p>                                       | 27 | 15 | Connective Tissue Development and Function, Tissue Morphology, Cellular Development |
| <p>ABCC3, AKR1B8 (includes EG:14187), ATF2, ATF3, ATP, CFD, cholesterol, CNDP2, CYB5B, CYP2E1, DBP, FGF2, FMO5, FOSL1, GCLC, GCLM, GDF15, HMGCR, hydrogen peroxide, IL1B, LAMA3, MT2A, MTHFD1L, P2RY2, P38 MAPK, PLA2G4A, PRKAA2, PRKD1, progesterone, SLC3A1, STARD5, TERT, TNFRSF17, TSPAN4, ursodeoxycholic acid</p> | 27 | 15 | Cellular Growth and Proliferation, Cancer, Free Radical Scavenging                  |
| <p>ABCC3, AMPK, Ap1, ARNTL, carbon monoxide, CLOCK, Cyclin B, CYP2E1, EZH2, glycerol, HMGCS2, IL6, KITLG (includes EG:4254), KLF2, LDLR, LEP, MAP3K7, MID1IP1,</p>                                                                                                                                                      | 22 | 13 | Cancer, Cell Death, Nutritional Disease                                             |

## Online Supporting Material

NFKB2, NGEF, PER2, PLK1, PRDX1, prostaglandin D2, RAC1, SC4MOL, SLC13A2, SRXN1, ST3GAL4, TEF, TNFRSF1B, TNFSF11, UCP2, USP2, WEE1

---

### D. Upregulated genes at 6 months

---

|                                                                                                                                                                                      |    |    |                                                                                                         |
|--------------------------------------------------------------------------------------------------------------------------------------------------------------------------------------|----|----|---------------------------------------------------------------------------------------------------------|
| APLP1 (includes EG:333), CENTA1, COL8A1, CPEB1, CRY2, CTGF, CYP51A1, DBP, ES22, FOS, FRZB, GSTA3, GSTA5, GSTM6, GSTP1, HOXA7, ID3, JUNB, LMNA, MGST3, NQO1, PCYT2, PER1, PER2, SSTR2 | 49 | 25 | Behavior, Nervous System Development and Function, Cellular Compromise                                  |
| ARL2BP, CBR1, DGAT2, DHCR7, GNA11, GNB5, MVK, NGEF, NSDHL, PCSK9, PMVK, RASD2, SC4MOL, SQLE, SREBF2, TRIP10                                                                          | 27 | 16 | Cardiovascular System Development and Function, Cell Signaling, Nervous System Development and Function |
| CCDC85B, CDK10, CYP2C18, DCXR, DECR2, DIO1, EMID1, KLF4, MPST, MUC1, PIB5PA, TM7SF3, TSPAN4, TST                                                                                     | 22 | 14 | Free Radical Scavenging, Molecular Transport, Cellular Growth and Proliferation                         |
| CBR3, CLDN4, CNDP2, FGFBP1, HMGCL, HSD17B7, IHH, KHK, LEFTY1, MEP1A, MGLL, MIR16, TSC22D1, VDAC3                                                                                     | 22 | 14 | Cell Death, Reproductive System Disease, Organismal Development                                         |
| AFM, AK1, AKR1B8 (includes EG:14187), CRIP1, DDAH2, LMNA, MID1IP1, NKX2-3, NOV, PPM1G, PTGS1, SLC27A2, TDO2                                                                          | 20 | 13 | Cell Death, DNA Replication, Recombination, and Repair, Cell Cycle                                      |
| ACAA1B, ACADS, ALDH1A7, ARPC1A, B4GALT3, CLDN4, ENTPD5, PF4, PLS3, SQLE, TCAP, TPPP                                                                                                  | 18 | 12 | Cancer, Cellular Movement, Cell-To-Cell Signaling and Interaction                                       |
| ADD1, DES, DUSP8, DUSP16, GADD45A, KLF4, MUC1, NEDD4, PTPRH, RHOD, RHOU                                                                                                              | 16 | 11 | Cell Cycle, Cellular Movement, Cellular Assembly and Organization                                       |
| AP1S1, CNN2, EIF2AK1, KRT17, PACSIN3, PDLIM2, RIPK4,                                                                                                                                 | 16 | 11 | Amino Acid Metabolism, Post-                                                                            |

## Online Supporting Material

SGK2, SLC25A1, SRPK3, TEF

Translational Modification, Small Molecule Biochemistry

---

### E. Downregulated genes at 3 months

---

|                                                                                                                                                                                                                                                                                               |    |    |                                                                                                                          |
|-----------------------------------------------------------------------------------------------------------------------------------------------------------------------------------------------------------------------------------------------------------------------------------------------|----|----|--------------------------------------------------------------------------------------------------------------------------|
| ACTA2, Akt, AREG, CAV1, COL1A1, CTGF, EGFR, ELN, FBLN2, FBN1, GHR, Gpcr, GREM1, growth factor receptor, Igfbp, IGFBP2, IGFBP4, Integrin, Jnk, LOX, LOXL1, Mmp, MYOCD, Pdgf, PDGF BB, PLAT, PLEKHA1, PTN, Ras, RGS1, SERPINF1, Tgf beta, TNFRSF11A, TNFRSF12A, Vegf                            | 45 | 23 | Skeletal and Muscular System Development and Function, Cellular Movement, Cellular Growth and Proliferation              |
| ADIG, CD2, CD274, CD1D, CD59A, CDR2, CPD, CXCL16, DBI, ENAH, HSPA1L, IFNG, LAMP1, LPIN1, ME1, MYC, NFIL3, NR1D1, PIGR, PPARG, progesterone, PSMC5, PSMD6, PSMD7, RFX1, RFX2, SCD, SDPR, SPSB1, TES, TFRC, TLE4, TSPO, TTC28, ZYX                                                              | 40 | 21 | Cell-To-Cell Signaling and Interaction, Cellular Growth and Proliferation, Hematological System Development and Function |
| ACLY, amino acids, B3GNT5, CENPA, COL5A1, COL7A1, CSRP1, DAD1, EMP3, ERBB2, F2, FBLN2, FGF10, ITGB4BP, LOC63928, LPIN1, MFAP2, NNMT, PARP3, PDLIM4, PLEKHB1, PPAP2A, PTPRK, retinoic acid, RHOJ, SCD, SDF2, SDPR, SERPINH1, SPOCK1, TGFB1, TLE1, TMOD3, TPM4, TSPAN8                          | 33 | 18 | Tissue Development, Cancer, Cellular Growth and Proliferation                                                            |
| Adenylate Cyclase, ANXA5, Ap1, ARNTL, Arntl-Clock, BAG2, BRD2, CCND2, CLOCK, COL18A1, COL4A1, COL5A1, CRY2, Cry-Period, Cyclin A, DUSP6, E2f, E2F2, EDN1, G&alpha;i/o, ganglioside GD2, GNAI1, Histone h3, LGALS1, Mapk, Mek, MMP14, NR1D1, P38 MAPK, PI3K, Pka, Pkc(s), PPP1R1A, RGS4, SSTR3 | 28 | 16 | Behavior, Cell Signaling, Nervous System Development and Function                                                        |
| BAG1, BIK, C10ORF58, CGI-38, COL4A1, CRYAB, DHFR, DNAJB1, HIST1H1C, HSPA1L, HSPA4L, HSPH1, HTRA1, ID1,                                                                                                                                                                                        | 28 | 16 | Cancer, Cellular Growth and Proliferation, Reproductive System                                                           |

## Online Supporting Material

|                                                                                                                                                                                                                                                                                            |    |    |                                                                                                                           |
|--------------------------------------------------------------------------------------------------------------------------------------------------------------------------------------------------------------------------------------------------------------------------------------------|----|----|---------------------------------------------------------------------------------------------------------------------------|
| IFI16, IGFBP4, KLF6, MATN4, MYOD1, PHLDA3, PTGES3, RRM2, RXRB, SERPINB2, SFRP1, SMN1, SNCA, STIP1, TEAD2, TERT, TMEM43, TOP1, TP53, TPPP, WNT4                                                                                                                                             |    |    | Disease                                                                                                                   |
| alpha-estradiol, APBB1, AQP4, ARNT2, beta-estradiol, C13ORF15, CDC2, Cdc2-CyclinB-Sfn, COPZ2, CRABP2, DMN, EFNB2, FAH, FBLN2, GJB1, GPC1, IGFBP2, IGFBP4, KRAS, KRT5, NFE2, PDLIM4, PLEKHA6, PPP1R3C, PTGER3, RERG, RNA polymerase II, SFN, STOM, TEAD2, TEAD4, TGFB3, TRIM25, VEGFA, YAP1 | 28 | 16 | Cellular Growth and Proliferation, Cancer, Endocrine System Development and Function                                      |
| <hr/>                                                                                                                                                                                                                                                                                      |    |    |                                                                                                                           |
| F. Downregulated genes at 6 months                                                                                                                                                                                                                                                         |    |    |                                                                                                                           |
| CD74, COL4A1, CSF2RB, FCGR2A, FCGR2B, GFII, GPD2, GPR65, HYOU1, IDE, IGF1, IL7R, KNG1 (includes EG:16644), LCN2, LCP2, LOX, LY6A, OSMR, PAPP, PTK6, SERPINA3, SH2D2A, SLPI, SOCS1, TRIB3, ZBTB16                                                                                           | 48 | 26 | Cellular Growth and Proliferation, Hematological System Development and Function, Immune Response                         |
| ARNTL, CCL8, CD86, CD3D, CD3E, CD3EAP, CREBBP, EXPI, FHL2, GADD45G, GFPT2, HIRIP3, HSP90B1, IFI16, IGH-2, IL1RL1, NFIL3, NPAS2, POLR1A, POLR1E, TFRC, TLR3, TLR4, TRAT1                                                                                                                    | 43 | 24 | Cellular Development, Hematological System Development and Function, Immune and Lymphatic System Development and Function |
| ADAM17, ARRDC3, C10ORF10, C1QB, CCL21, IL1RL1, IL7R, KLRD1, LY86, PES1, RASD1, RIOK1, RNASE6, SELPLG, SERPINA3, SPTA1, XCL1                                                                                                                                                                | 27 | 17 | Cellular Movement, Hematological System Development and Function, Immune Response                                         |
| ANXA13, AURKA, BLM, CEP55, CSN3, DLG7, ELN, H2AFX, IL7R, LOX, MPHOSPH1, MSLN, PPP1R10, RPRM, SLPI, SMPD3, TNFAIP2                                                                                                                                                                          | 27 | 17 | Cell Cycle, Cancer, DNA Replication, Recombination, and Repair                                                            |



## Online Supporting Material

|                                                                                                                                                      |    |    |                                                                                                                   |
|------------------------------------------------------------------------------------------------------------------------------------------------------|----|----|-------------------------------------------------------------------------------------------------------------------|
| CYP4F3, HIST1H3F, IL13RA2, NCAPH, NFIL3, NMU, PACAP, POU2AF1, RETNLA, RETNLB (includes EG:57263), RIPK3, SAMSN1, SESN1, SH3KBP1, SLC16A6, SYNJ2, XDH | 27 | 17 | Cellular Compromise, Immune and Lymphatic System Development and Function, Cell-To-Cell Signaling and Interaction |
| BCAT2, CCL17, CD160, EGLN3, IRF4, IRF5, LOX, LY6C, MICAL1, NAPSA, NUP210, SLC39A4 (includes EG:55630), SLPI, STAT4, STX11, WARS                      | 25 | 16 | Cancer, Cell-To-Cell Signaling and Interaction, Reproductive System Disease                                       |
| ABCG1, ADAMTS4, BHLHB8, C1ORF164, CALCB, CASC5, CDCA8, CLDN10, ELN, HIST1H3C, HLA-DQB2, LOX, SLC5A3, TNFAIP2                                         | 20 | 14 | Tissue Development, Respiratory Disease, Cellular Growth and Proliferation                                        |
| CITED4, COL4A1, FST, GPX2, KIF23, KLF15, MYRIP, PDIA6, PPP1R9A, PPP3CC, RAC2, SCIN, SEMA5A, UCK2 (includes EG:7371)                                  | 20 | 14 | Immune Response, Cell-To-Cell Signaling and Interaction, Tissue Development                                       |
| BCL2A1, beta-estradiol, C2, C3, CD55, CDC7, CRSP9 (includes EG:9443), H6PD, KCNJ8, MSC, PDLIM5, RNF144, SECTM1, TCF12                                | 19 | 13 | Cell Cycle, Infectious Disease, Cell Death                                                                        |
| ADSL, CLDN1, GRPR, IL1RL1, MAP3K6, NUPL2, PTPN22, PTPRO, PTPRT, REFBP2, SCD, TRIB3, TSSK6                                                            | 19 | 13 | Amino Acid Metabolism, Post-Translational Modification, Small Molecule Biochemistry                               |

---

<sup>1</sup>Biological Networks in upregulated, downregulated, and integrated total differentially expressed datasets ( $P$ -value  $< 0.05$ , no FDR applied) were generated through the use of IPA. <sup>2</sup>The network Score is based on the hypergeometric distribution and is calculated with the right-tailed Fisher's exact test. The score is the negative log of this  $P$ -value. (A score of greater than 2 indicates that there is a less than 1 in 100 chance that the Focus Genes were assembled into a network due to random chance alone.) <sup>3</sup>Upward-pointing arrows indicate increased expression and downward-pointing arrows indicate decreased expression in the WD group (n=8) compared to Controls (n=8).

## Online Supporting Material
