# Supplementary material
Source: PubMed Central journal article supplement (PMC2762150)
Supplement: jn.108.104125_2.pdf [file jn.108.104125_2.pdf]

# Online Supporting Material

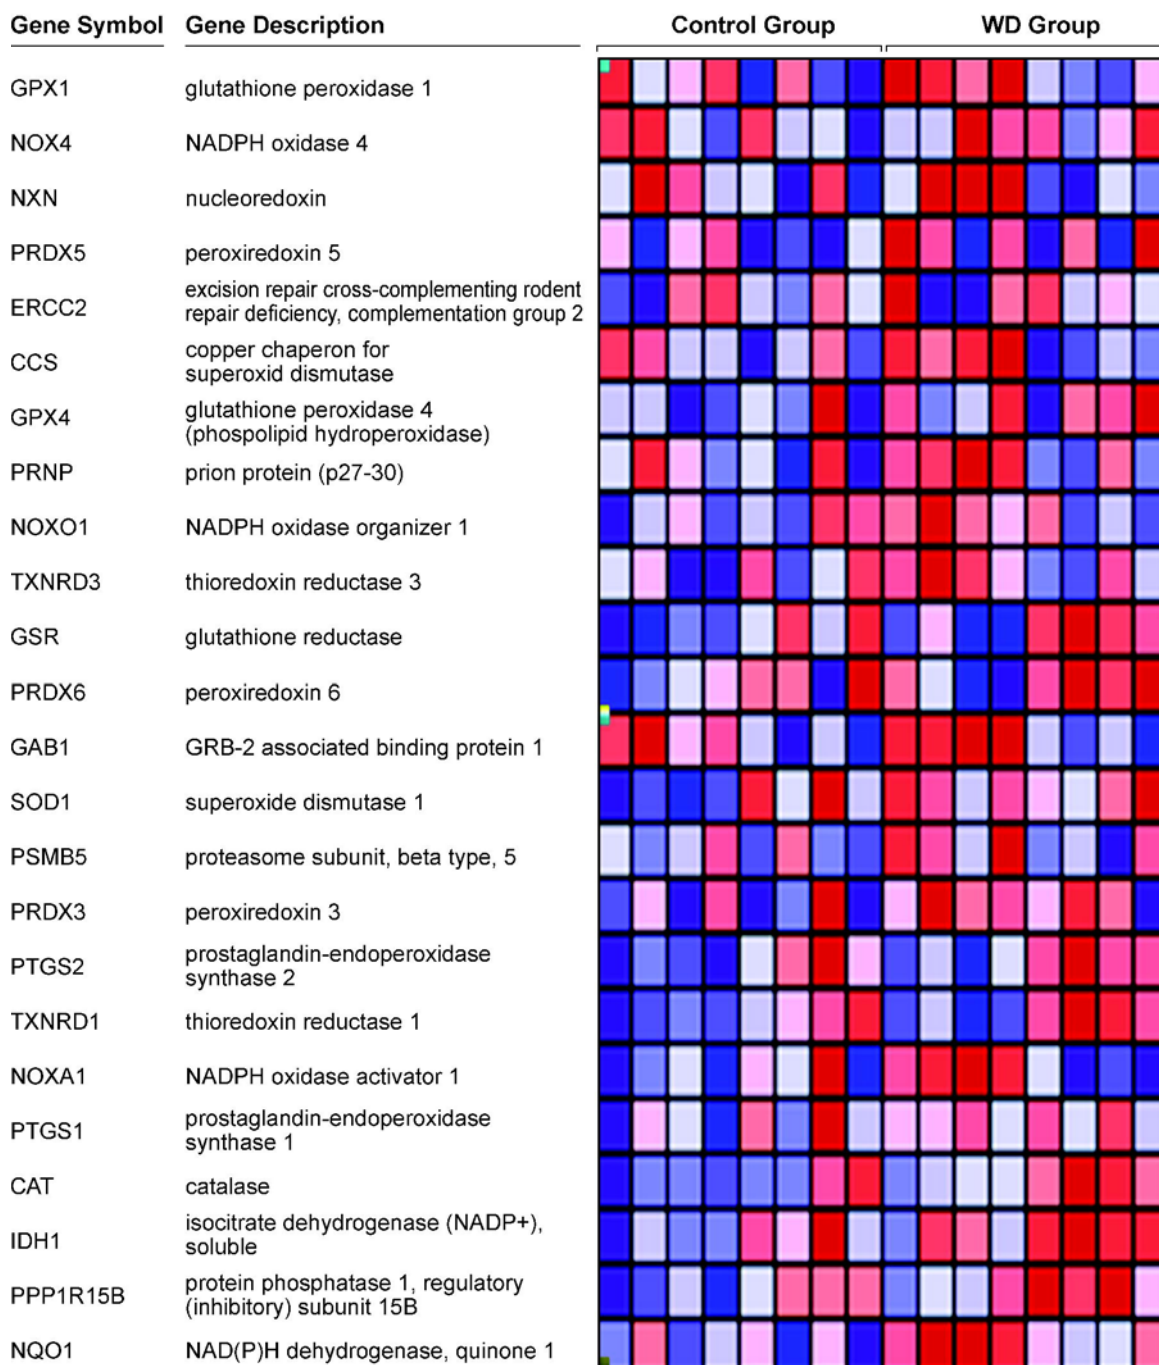

## Supplemental Figure 1

**Upregulated oxidative stress related genes in the colon of C57Bl/6J mice after 6 mo feeding of WD (n=8) compared to controls (n=8).** Heat map generated by GSEA displays expression levels of oxidative stress genes that were significantly upregulated by the WD at 6 mo. The expression levels of genes significantly modified are color-coded red for high expression and blue for low expression. Significance was determined using a nominal  $P$ -value  $< 0.05$  and FDR  $< 0.25$ .
