# Supplementary material
Source: PubMed Central journal article supplement (PMC2762150)
Supplement: jn.108.104125_3.pdf [file jn.108.104125_3.pdf]

Online Supporting Material

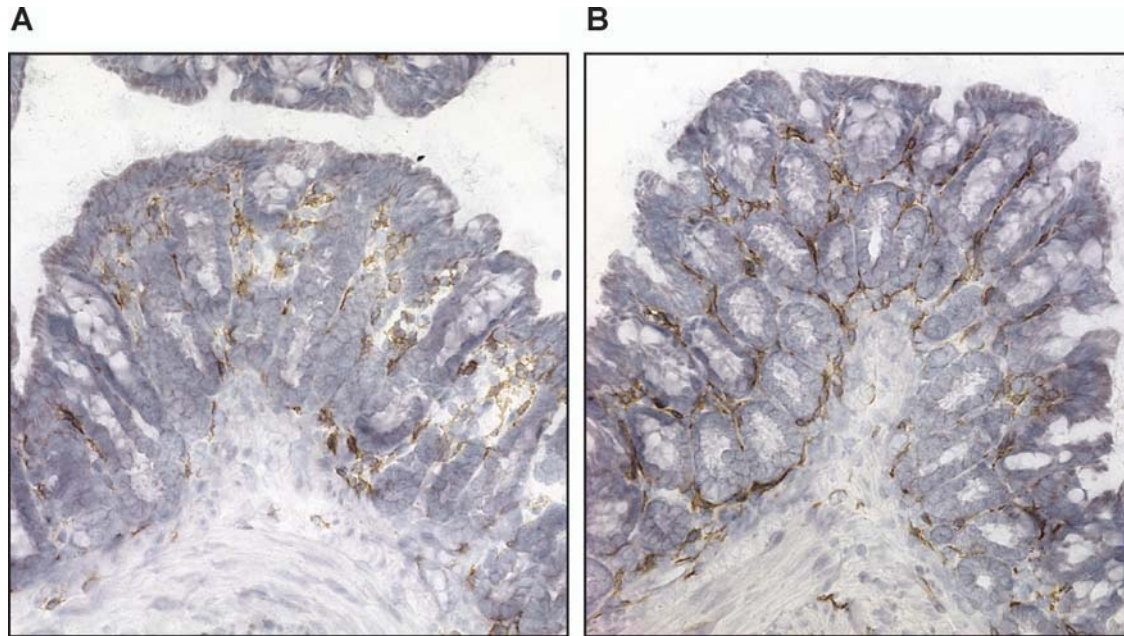

| Time points | F4/80                       |                          |
|-------------|-----------------------------|--------------------------|
|             | Staining pixel/area<br>Fold | Cell number/area<br>Fold |
| 3 months    | 1.19                        | 1.29***                  |
| 6 months    | 1.35*                       | 1.76***                  |

**Supplemental Figure 2.** Representative digital images (200x magnifications) showing the overall distribution of F4/80 immunostained cells in the distal colon of C57Bl/6 mice after 6 months feeding of AIN-76A diet (A) or WD fed (B). (C) Semi-quantitative measurements of colonic lamina propria macrophages by computerized histomorphometry analysis after 6 month feeding of the WD. Data are mean values expressed as fold change compared to controls, n=7. \* Different from control (AIN-76A),  $P < 0.05$ ; \*\*\*  $P < 0.001$
